# Supplementary material
Source: PubMed Central journal article supplement (PMC5664153)
Supplement: NIHMS910401-supplement-Methods.pdf [file NIHMS910401-supplement-Methods.pdf]

## Supplementary Methods

### *Interventional Radiology Procedures:*

The following SQL Search text was used to identify interventional Radiology Procedures from the raw table [Radiology\_radx\_examinations\_70\_03].

#### Transarterial Embolization (Bland, Chemo- or Radio-Embolization)

“WHERE ([RadNucMedProc] like '%embo%' OR [RadNucMedProc] like '%tace%') AND [RadNucMedProc] not like '%fibroid%' AND [RadNucMedProc] not like '%head%' AND [RadNucMedProc] not like '% CNS IC%' AND [RadNucMedProc] not like '%intracranial%' AND [RadNucMedProc] not like '%uter%' AND [RadNucMedProc] not like '%carot%' AND [RadNucMedProc] not like '%pulm%' AND [RadNucMedProc] not like '%TIP%' AND [RadNucMedProc] not like '%ECTOMY%' AND [RadNucMedProc] not like '%THRMB%' AND [RadNucMedProc] not like '%HEMOR%' AND [RadNucMedProc] not like '%VENOUS%' AND [ExamStatus] not like 'CANC%' AND ([ExamDate] is not null OR [Visit] is not null)”

#### 90Y-radioembolization (cross-referenced with transarterial embolization)

“WHERE ([RadNucMedProc] like '%Y-90%' OR [RadNucMedProc] like '%Y90%') AND [RadNucMedProc] not like '%renal%' AND [ExamStatus] not like 'CANC%' AND ([ExamDate] is not null OR [Visit] is not null)”

#### Radiofrequency Ablation

“WHERE ([RadNucMedProc] like '%ablation%' OR [RadNucMedProc] like '%abalation%') AND [RadNucMedProc] not like '%fibroid%' AND [RadNucMedProc] not like '%head%' AND [RadNucMedProc] not like '%lung%' AND [RadNucMedProc] not like '%venous%' AND [RadNucMedProc] not like '%pulmon%' AND [RadNucMedProc] not like '%TIP%' AND [RadNucMedProc] not like '%fibroid%' AND [RadNucMedProc] not like '%head%' AND [RadNucMedProc] not like '%pulmon%' AND [RadNucMedProc] not like '%thyr%' AND [RadNucMedProc] not like '%ECTOMY%' AND [RadNucMedProc] not like '%SAPHEN%' AND [RadNucMedProc] not like '%FOR RENAL%' AND [RadNucMedProc] not like '%FIBRO%' AND [RadNucMedProc] not like '%THRMB%' AND NOT ([RadNucMedProc] like '%RENAL%' AND [RadNucMedProc] not like '%LIVER%') AND NOT ([RadNucMedProc] like '%KIDNEY%' AND [RadNucMedProc] not like '%LIVER%') AND [ExamStatus] not like 'CANC%' AND ([ExamDate] is not null OR [Visit] is not null)”

#### Percutaneous Ethanol Injection

“WHERE ([RadNucMedProc] like '%ethan%' OR [RadNucMedProc] like '%alco%') AND [ExamStatus] not like 'CANC%' AND ([ExamDate] is not null OR [Visit] is not null)”

#### Cryoablation

“WHERE ([RadNucMedProc] like '%cryo%') AND [RadNucMedProc] not like '%kidney%' AND [RadNucMedProc] not like '%renal%' AND [ExamStatus] not like 'CANC%' AND ([ExamDate] is not null OR [Visit] is not null)”

#### Microwave Ablation

“WHERE ([RadNucMedProc] like '%microwave%') AND [RadNucMedProc] not like '%kidney%' AND [RadNucMedProc] not like '%renal%' AND [ExamStatus] not like 'CANC%' AND ([ExamDate] is not null OR [Visit] is not null)”

*Fee-basis Procedures*

| SQL Case                                                                                                                            | Therapeutic Procedure                                                          |
|-------------------------------------------------------------------------------------------------------------------------------------|--------------------------------------------------------------------------------|
| [CPTCode] like '47135' OR [CPTCode] like '47136' OR [CPTCode] like '4714%'                                                          | Liver Transplantation (cadaveric)                                              |
| [CPTCode] like '47133' OR [CPTCode] like '47134'                                                                                    | Liver Transplantation (live-donor)                                             |
| [CPTCode] like '47100'                                                                                                              | Resection (wedge)                                                              |
| [CPTCode] like '4712%' OR [CPTCode] like '4713%'                                                                                    | Resection (partial hepatectomy or lobectomy)                                   |
| [CPTCode] like '47370' OR [CPTCode] like '47379'                                                                                    | Laparoscopic Radiofrequency Ablation                                           |
| [CPTCode] like '47371'                                                                                                              | Laparoscopic Cryoablation                                                      |
| [CPTCode] like 'S2210'                                                                                                              | Cryoablation                                                                   |
| [CPTCode] like '47380'                                                                                                              | Open Radiofrequency Ablation                                                   |
| [CPTCode] like '47381'                                                                                                              | Open Cryoablation                                                              |
| [CPTCode] like '47382' OR [CPTCode] like '77013'                                                                                    | Percutaneous Radiofrequency Ablation                                           |
| [CPTCode] like '97020' OR [CPTCode] like '97024'                                                                                    | Percutaneous Microwave Ablation                                                |
| [CPTCode] like 'C2618%'                                                                                                             | Percutaneous Cryoablation                                                      |
| [CPTCode] like 'A9543' OR [CPTCode] like 'C2616'                                                                                    | <sup>90</sup> Y-radioembolization                                              |
| [CPTCode] IN ('37204', '37241', '37242', '37243', '37244', '75894', '75898', '75774')                                               | Transarterial Embolization                                                     |
| [CPTCode] like '96420' OR [CPTCode] like 'J9000'                                                                                    | Chemotherapy (if combined with Transarterial Embolization → Chemoembolization) |
| [CPTCode] like '77014%' OR [CPTCode] like '7742%' OR [CPTCode] like '7729%' OR [CPTCode] like '7777%'                               | Radiotherapy (external)                                                        |
| [CPTCode] like '77301%'                                                                                                             | Intensity-modulated radiation therapy                                          |
| [CPTCode] like '77373%' OR [CPTCode] like '77435%' OR [CPTCode] like 'G0173%' OR [CPTCode] like 'G0251%' OR [CPTCode] like 'G0339%' | Stereotactic Beam Radiotherapy                                                 |
| [CPTCode] like 'S9126' OR [CPTCode] like 'Q500%' OR [CPTCode] like 'T204%'                                                          | Hospice                                                                        |
